# Supplementary material for: Rapid sub-nanomolar protein determination in serum using electropolymerized molecularly imprinted polymers (E-MIPs)
Source: Royal Society of Chemistry journal article supplement (doi:10.1039/d3an01498c), 2023-01-01
Supplement: d3an01498c1.pdf [file d3an01498c1.pdf]

## Supplementary Figures

Fig.S1

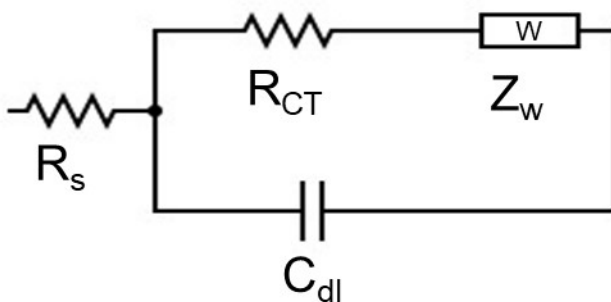

*Figure S1 Randles equivalent circuit used to characterise E-MIPs, comprising a charge transfer resistance ( $R_{CT}$ ) between the solution and the electrode surface, solution resistance ( $R_s$ ), the Warburg impedance ( $Z_W$ , associated with the diffusion of the electroactive species from the solution towards the electrode surface), and the double layer capacitance ( $C_{dl}$ ).*

Fig.S2a

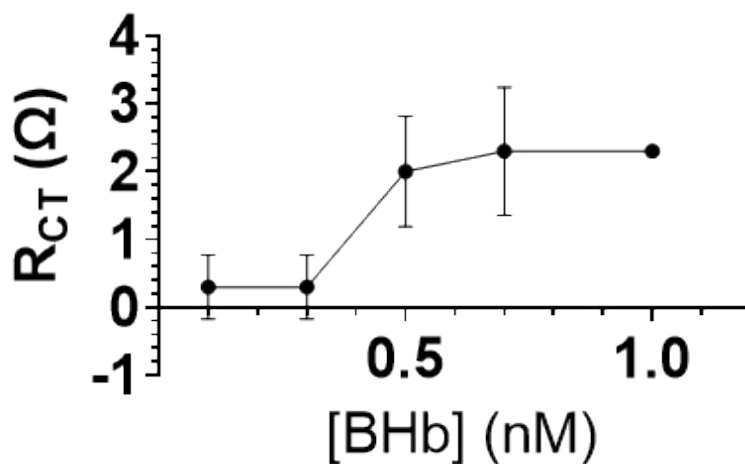

Fig.S2b

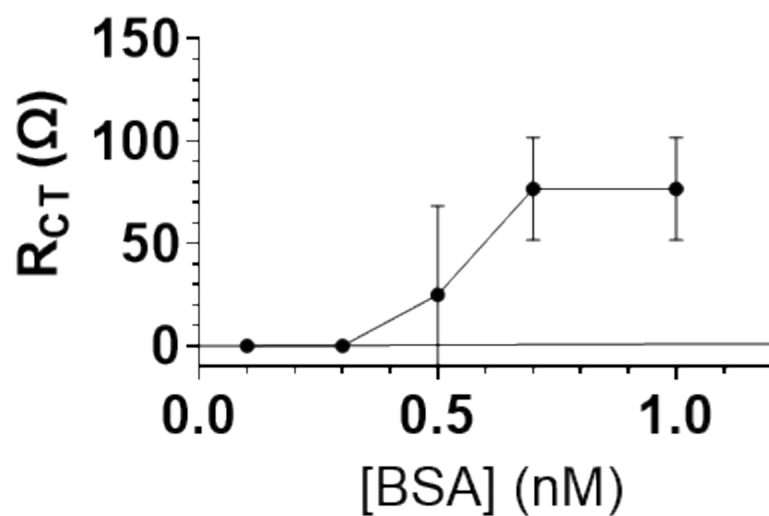

**Figure S2a** BHb determination using NIP-modified BT-Au electrode (giving imprinting factor,  $IF = 146:1$  at 1 nM); **Figure S2b** BSA determination using BHb MIP-modified BT-Au electrode (giving selectivity factor,  $\alpha = 6$  at 1 nM). Data represents mean  $\pm$  S.E.M.,  $n = 3$ .

| Sample    | Number of measurements | Average Roughness<br>$R_a$ / nm | RMS Roughness<br>$R_q$ / nm |
|-----------|------------------------|---------------------------------|-----------------------------|
| AT-Au     | 4                      | 388 ±105                        | 499 ±127                    |
| AT-Au NIP | 2                      | 399 ±6                          | 542 ±4                      |
| AT-Au MIP | 4                      | 327 ±49                         | 439 ±87                     |
| BT-Au     | 4                      | 504 ±45                         | 636 ±52                     |
| BT-Au NIP | 1                      | 489                             | 623                         |
| BT-Au MIP | 3                      | 533 ±82                         | 672 ±106                    |

***Table S1 Roughness data obtained for AT-Au and BT-Au electrodes, both before and after coating with polymers. Uncertainties are calculated from the standard deviations of the measurements.***
